# Supplementary material for: Flow-type hydrogen peroxide fuel cells with hemin-modified buckypaper catalysts
Source: Royal Society of Chemistry journal article supplement (doi:10.1039/d2tc05173g), 2023-01-01
Supplement: d2tc05173g1.pdf [file d2tc05173g1.pdf]

## Supporting Information

### **Flow-type hydrogen peroxide fuel cells with hemin-modified buckypaper catalysts**

Seon-Min Jeon<sup>a,&</sup>, Jungyeon Ji<sup>b,&</sup> and Yongchai Kwon<sup>a,b,\*</sup>

[a] Department of New and Renewable Energy Convergence, Seoul National University of Science and Technology, 232, Gongneung-ro, Nowon-gu, Seoul 01811, Republic of Korea

[b] Department of Chemical and Biomolecular Engineering, Seoul National University of Science and Technology, 232 Gongneung-ro, Nowon-gu, Seoul 01811, Republic of Korea

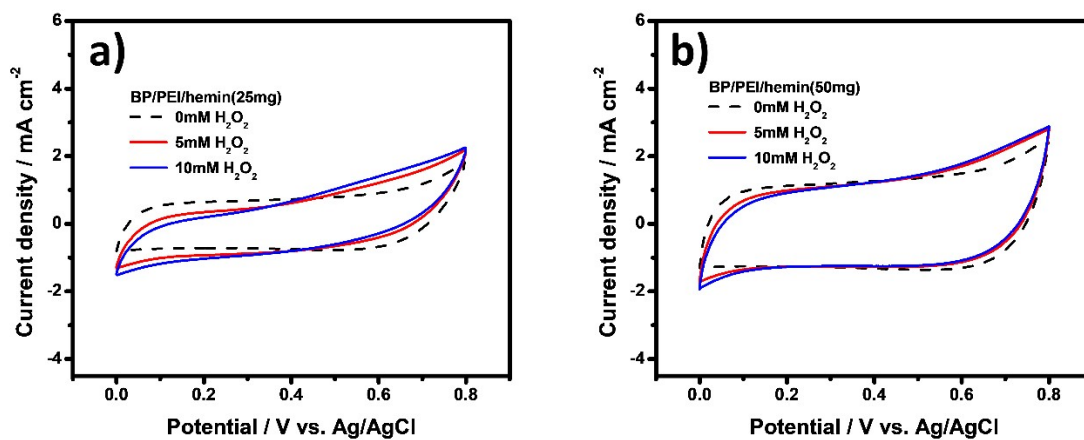

**Figure S1.** CV curves of (a) BP/PEI/hemin(25mg) and (b) BP/PEI/hemin(50mg) in the presence of H<sub>2</sub>O<sub>2</sub>. For the tests, 0.01 M PBS (pH 7.4) served as the electrolyte under N<sub>2</sub> conditions and the potential scan rate was 20 mV s<sup>-1</sup>.

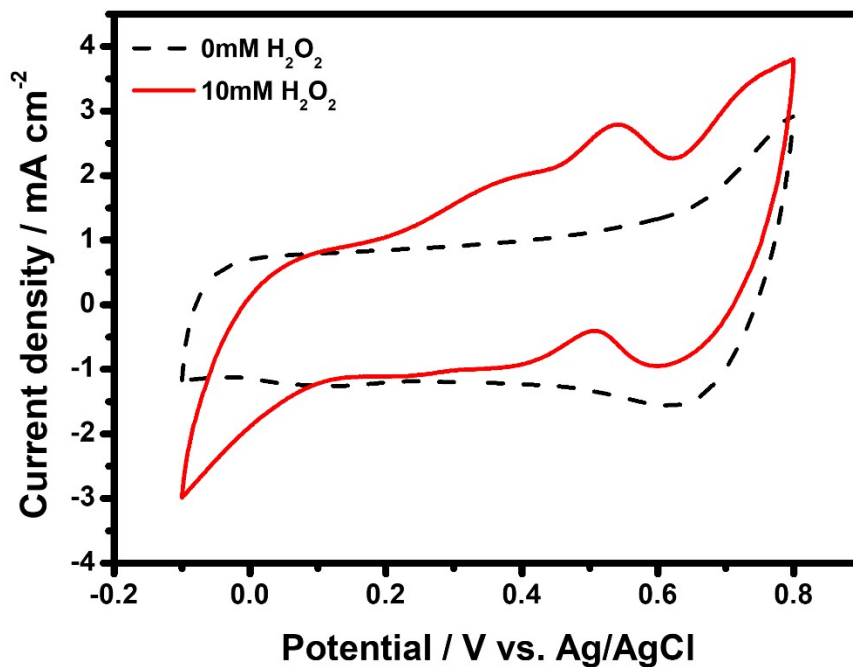

**Figure S2.** CV curves showing H<sub>2</sub>O<sub>2</sub> oxidation reaction by BP/CoPc in the presence of 10mM H<sub>2</sub>O<sub>2</sub>. For the tests, 0.01 M PBS (pH 7.4) served as the electrolyte under N<sub>2</sub> conditions and the potential scan rate was 20 mV s<sup>-1</sup>.

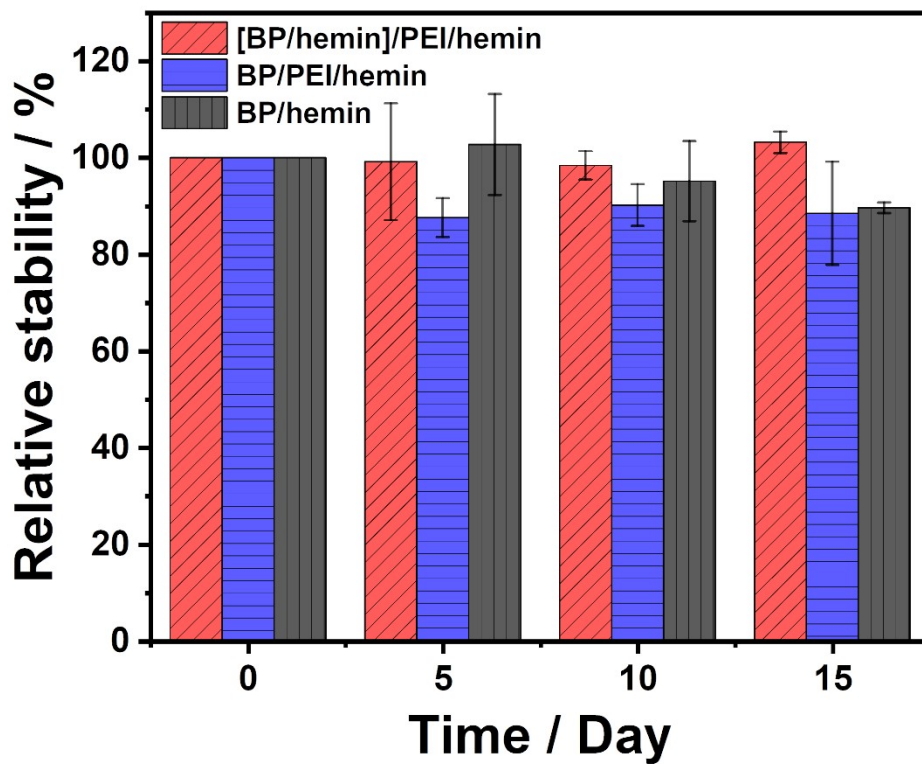

**Figure S3.** Stability of catalysts estimated by the periodic measurements of their catalytic activity for 15 days.
